# Four-factor Prothrombin Complex Concentrate for the Management of Patients Receiving Direct Oral Activated Factor X Inhibitors

Oliver Grottke, M.D., Ph.D., Sam Schulman, M.D., Ph.D.

Direct oral anticoagulants (DOACs) have been approved for the prevention of stroke and systemic embolism in atrial fibrillation, treatment and secondary prevention of venous thromboembolism (VTE), and thromboprophylaxis after major orthopedic surgery. DOACs achieve anticoagulation by inhibiting specific coagulation factors; apixaban, betrixaban, edoxaban, and rivaroxaban inhibit activated factor X, whereas dabigatran inhibits thrombin (factor IIa). In contrast to vitamin K antagonists such as warfarin, DOACs have more predictable pharmacokinetics and pharmacodynamics and fewer interactions with other medications and food, and they are not associated with the problems of a narrow therapeutic window like warfarin.<sup>1–3</sup> This allows for fixed oral dosing once or twice per day, without the need for anticoagulation monitoring or dose adjustments.

Randomized clinical trial data demonstrate that activated factor X inhibitor therapies are noninferior to other anticoagulants such as vitamin K antagonists.<sup>4</sup> DOACs also have favorable safety and efficacy profiles, as demonstrated by evidence from “real-world” cohorts.<sup>5–7</sup> The risk of intracranial hemorrhages was lower with all the DOACs compared with warfarin,<sup>8</sup> although the rate of gastrointestinal bleeding might be increased with rivaroxaban.<sup>9</sup> Other studies have shown that outcomes after bleeding events were similar or less severe for patients receiving DOACs than those receiving vitamin K antagonists.<sup>10,11</sup> The number of patients using DOACs will likely increase due to their advantages over existing therapies, and thus the number of bleeding events in patients on DOAC therapy is also expected to increase. Therefore, for patients presenting with severe or life-threatening bleeding or for patients undergoing urgent surgery, a clear strategy to reverse anticoagulation and to achieve hemostasis is essential.

## Management of Patients on DOAC Therapies

While recommendations for the management of vitamin K antagonist-related bleeding are well established,<sup>12–14</sup> guidelines for managing patients on DOACs,<sup>15,16</sup> which were developed more recently, are based on limited evidence. The

decision to stop treatment depends on a patient's risk of bleeding *versus* their risk of thromboembolic complications. When deciding to reverse activated factor X inhibitors, their short elimination half-life should also be taken into account<sup>16–19</sup> (table 1); hemostasis is restored approximately 12 to 24 h after cessation of DOACs, assuming normal renal function.<sup>16,20</sup> As DOACs are partially eliminated via the kidney, they can accumulate in patients with impaired renal function.<sup>16,21</sup>

## Reversal Strategies in Emergency Cases

Coagulopathy, which is common in trauma and perioperative bleeding, is associated with increased morbidity and mortality, and anticoagulation can further increase a patient's risk of developing coagulopathic bleeding.<sup>14,22</sup> Thus, in cases of life-threatening bleeding, restoration of hemostasis requires prompt reversal of anticoagulation in addition to a multimodal approach using hemostatic agents.<sup>16</sup> In the context of this review, we define severe bleeding according to the International Society on Thrombosis and Haemostasis criteria for major bleeding in nonsurgical patients having a symptomatic presentation.<sup>23</sup>

For reversal of dabigatran, a specific agent is available: idarucizumab, a humanized antibody fragment that specifically binds dabigatran with high affinity and reverses its effects within minutes.<sup>24,25</sup> For reversal of activated factor X inhibitor therapies, andexanet alfa, a recombinant modified human activated factor X protein that specifically binds activated factor X inhibitors, has been developed.<sup>26,27</sup> Although recently approved by the U.S. Food and Drug Administration (Silver Spring, Maryland), its labeled use is currently restricted as clinical evidence for its effectiveness was based on studies in healthy volunteers, whereas improvement in hemostasis in bleeding patients has not been established.<sup>28</sup> Indeed, such improvement has only been demonstrated for four-factor prothrombin complex concentrate (four-factor PCC) *versus* fresh frozen plasma in a randomized clinical trial in surgical patients.<sup>29</sup> In this

This article has been selected for the Anesthesiology CME Program. Learning objectives and disclosure and ordering information can be found in the CME section at the front of this issue. This article is featured in “This Month in Anesthesiology,” page 1A.

Submitted for publication November 5, 2019. Accepted for publication July 1, 2019. From the Department of Anesthesiology, Rheinisch-Westfälische Technische Hochschule Aachen University Hospital, Germany (O.G.); Thrombosis and Atherosclerosis Research Institute and Department of Medicine, McMaster University, Hamilton, Canada (S.S.); and Department of Obstetrics and Gynecology, The First I.M. Sechenov Moscow State Medical University, Russia (S.S.).

Copyright © 2019, the American Society of Anesthesiologists, Inc. All Rights Reserved. Anesthesiology 2019; 131:1153–65. DOI: 10.1097/ALN.0000000000002910

**Table 1.** Pharmacokinetic Properties of Direct Oral Anticoagulants

|                     | Dabigatran <sup>81</sup>  | Apixaban <sup>19</sup> | Rivaroxaban <sup>17</sup> | Edoxaban <sup>18</sup> |
|---------------------|---------------------------|------------------------|---------------------------|------------------------|
| Mechanism of action | Direct thrombin inhibitor | Xa inhibitor           | Xa inhibitor              | Xa inhibitor           |
| Time to peak        | 2 h                       | 3–4 h                  | 2–4 h                     | 1–2 h                  |
| Terminal half-life  | 11–14 h*                  | 12 h                   | 5–13 h                    | 10–14 h                |
| Renal excretion     | 85%                       | 27%                    | ~33%                      | 50%                    |

\*Longer in patients with renal insufficiency.

trial with 181 patients on vitamin K antagonist, “effective hemostasis” was observed in 90% of patients with PCC *versus* 75% with fresh frozen plasma (difference 14.3%; 95% CI 2.8 to 25.8) and rapid reduction of international normalized ratio was achieved in 55% and 10%, respectively (difference 45.3%; 95% CI, 31.9 to 56.4). In addition, andexanet alfa is not widely available and is expected to be costly (see Economic Considerations for the Use of Prothrombin Complex Concentrate *versus* Andexanet Alfa section).

Several nonspecific reversal strategies have been studied as potential DOAC reversal agents, including fresh frozen plasma, three-factor PCC or four-factor PCC, activated PCC, and recombinant activated factor VII.<sup>30</sup> Due to its well-documented efficacy and safety in the urgent reversal of vitamin K antagonist, four-factor PCC has emerged as a promising agent to antagonize the effects of activated factor X inhibitors, although the mechanism of action is different, as discussed at the end of the next paragraph.<sup>12–14</sup>

PCCs contain either three or four coagulation factors (factors II, IX, and X, with or without factor VII) and, depending on the formulation, similar proportions of coagulation inhibitors such as protein C, protein S, and low doses of heparin.<sup>31–33</sup> The mechanism of action of PCCs is important for understanding their therapeutic applications. Vitamin K antagonists such as warfarin function by reducing levels of factors II, VII, IX, and X. For acute substitution, for example in severe bleeding, where coagulopathy is caused by consumption and dilution due to massive transfusion, PCCs serve as a source of coagulation factors. In contrast, levels of coagulation factors in bleeding patients on DOAC therapies are not primarily affected by the DOAC but the function of a single factor, either thrombin or activated factor X, is inhibited. The exact mechanism whereby PCC may improve hemostasis under activated factor X inhibition has not been clarified yet. Several animal studies and a phase I trial have indicated that there is a dose-dependent effect,<sup>34–37</sup> but the mechanism of action can probably not be explained by a simple stoichiometric reaction. On a molar basis, the concentration of FX in PCC is not sufficient to overcome the antagonizing effect of the activated factor X inhibitor. Instead, PCCs may restore hemostasis in patients on DOACs as they increase both prothrombin and FX levels at the site of injury and may exert a compensatory prohemostatic effect with increased thrombin generation potential.

There are considerable variations among countries in the availability and licensing status of PCCs. For example, four-factor PCCs have been used for many years in Europe, where their license is not restricted to vitamin K antagonist reversal; thus, PCCs have a broad approval for the “treatment and prophylaxis of bleeding in acquired deficiency of prothrombin complex coagulation factors.”<sup>38,39</sup> In the United States, however, four-factor PCC was only approved in 2013 and is currently restricted in use to the urgent reversal of vitamin K antagonist therapy.

### PCC in the Reversal of Activated Factor X Inhibitors

The benefit of PCC for management of activated factor X inhibitor–associated bleeds was first explored in animal models of acute hemorrhage using different injury approaches (*e.g.*, kidney incision, hepatosplenic bleeding, mesenteric bleeding, and intracranial hemorrhage)<sup>40–42</sup> and in spiking experiments in blood from human volunteers<sup>42–47</sup> (table 2). These studies provide evidence for improvement of surrogate markers such as partial or full normalization of prothrombin time (useful for rivaroxaban but not for apixaban or edoxaban), endogenous thrombin potential, or thrombin generation.

Phase I studies in human volunteers involved a supra-therapeutic dose of rivaroxaban, apixaban, or edoxaban followed by administration of PCC at different doses (10 to 50 IU/kg body weight) and showed similar results in improvement of surrogate markers as was seen for the animal and *ex vivo* studies.<sup>33,37,48–50</sup> There was a dose-dependent response whereby 10 IU PCC/kg body weight was inadequate for activated factor X inhibitor reversal, 25 IU/kg body weight had partial effect, and 37.5 IU/kg body weight gave better reversal but still not complete normalization of coagulation parameters. A randomized placebo-controlled study using a punch biopsy bleeding model in healthy subjects on edoxaban reported reversal to baseline for bleeding duration and a trend toward reduced bleeding volume after administration of four-factor PCC, although CIs for the effect on bleeding duration overlapped with those for placebo.<sup>37</sup> Conversely, a similar study reported that four-factor PCC partially reversed the effects of rivaroxaban on thrombin generation but had no effect on bleeding duration or volume.<sup>51</sup>

**Table 2.** Overview of *Ex Vivo* Studies and Studies in Healthy Volunteers of the Efficacy of Four-factor PCC

|                                                                       | Study Design                                                                  | No.                                | Xa inhibitor                              | PCC Dose(s)         | Outcomes                                                                                                                                                                                                                                                                                        |
|-----------------------------------------------------------------------|-------------------------------------------------------------------------------|------------------------------------|-------------------------------------------|---------------------|-------------------------------------------------------------------------------------------------------------------------------------------------------------------------------------------------------------------------------------------------------------------------------------------------|
| <i>Ex vivo</i> studies                                                |                                                                               |                                    |                                           |                     |                                                                                                                                                                                                                                                                                                 |
| Fukuda <i>et al.</i> , 2012, <i>Thromb Haemost</i> <sup>42</sup>      | Spiked human plasma                                                           | (Pooled)                           | Edoxaban (up to 300 ng/ml)                | 0.15, 0.5, 1.5 U/ml | • PCC (0.15, 0.5 and 1.5 U/mL) reduced PT                                                                                                                                                                                                                                                       |
| Marlu <i>et al.</i> , 2012, <i>Thromb Haemost</i> <sup>46</sup>       | Randomized crossover study; spiked human plasma                               | 10                                 | Rivaroxaban (20 mg)                       | 0.25, 0.5, 1 U/ml   | • PCC dose-dependently increased ETP AUC and thrombin peak<br>• Slight reduction in lag time<br>• No effect on time to peak<br>• PCC normalized thrombin potential<br>• PCC did not normalize PT                                                                                                |
| Dinkelaar <i>et al.</i> , 2013; <i>J Thromb Haemost</i> <sup>43</sup> | Spiked human plasma and whole blood samples                                   | 9                                  | Rivaroxaban (up to 800 µg/l)              | Up to 4 IU/ml       | • PCC significantly reversed PT prolongation<br>• PCC did not reverse CT prolongation<br>• PCC concentration-dependently increased ETP<br>• PCC shortened prolongation of CT and CFT                                                                                                            |
| Perzborn <i>et al.</i> , 2014, <i>Thromb Res</i> <sup>41</sup>        | Spiked human plasma and whole blood samples                                   | 6                                  | Rivaroxaban (200–1,000 ng/ml)             | 0.2–1.0 U/ml        | • PCC restored thrombin generation<br>• 25 and 50 IU/kg PCC did not significantly improve PT<br>• 25 and 50 IU/kg PCC significantly corrected aPTT<br>• 25 IU/kg PCC significantly corrected CT but results did not reach significance with 50 IU/kg                                            |
| Escolar <i>et al.</i> , 2015, <i>Circ J</i> <sup>45</sup>             | Spiked steady and circulating human blood                                     | 8                                  | Rivaroxaban (230 ng/ml)                   | 50 IU/kg            | • PCC restored thrombin generation<br>• 25 and 50 IU/kg PCC did not significantly improve PT<br>• 25 and 50 IU/kg PCC significantly corrected aPTT<br>• 25 IU/kg PCC significantly corrected CT but results did not reach significance with 50 IU/kg                                            |
| Körber <i>et al.</i> , 2016, <i>Blood Transf</i> <sup>47</sup>        | Spiked human blood samples                                                    | 10                                 | Rivaroxaban (median 603 ng/ml)            | 25, 50 IU/kg        | • PCC restored thrombin generation<br>• 25 and 50 IU/kg PCC did not significantly improve PT<br>• 25 and 50 IU/kg PCC significantly corrected aPTT<br>• 25 IU/kg PCC significantly corrected CT but results did not reach significance with 50 IU/kg                                            |
| Studies in healthy volunteers                                         |                                                                               |                                    |                                           |                     |                                                                                                                                                                                                                                                                                                 |
| Eerenberg <i>et al.</i> , 2011, <i>Circulation</i> <sup>62</sup>      | Randomized, double-blind, placebo-controlled crossover study                  | 12                                 | Rivaroxaban (20 mg twice daily for 2.5 d) | 50 IU/kg            | • PCC normalized PT<br>• PCC normalized ETP                                                                                                                                                                                                                                                     |
| Levi <i>et al.</i> , 2014, <i>J Thromb Haemost</i> <sup>63</sup>      | Open-label, single-center, parallel-group study of 3F-PCC vs four-factor-PCC  | 35 (3F-PCC=12; four-factor-PCC=11) | Rivaroxaban (20 mg twice daily for 4 d)   | 50 IU/kg            | • PCC reduced prolonged PT (four-factor-PCC>3F-PCC)<br>• PCC increased thrombin generation (3F-PCC>four-factor-PCC)<br>• PCC did not reverse prolonged aPTT<br>• 25 and 37.5 IU/kg PCC restored PT prolongation<br>• 25 and 37.5 IU/kg PCC increased ETP                                        |
| Cheung <i>et al.</i> , 2015, <i>J Thromb Haemost</i> <sup>48</sup>    | Randomized, double-blind, placebo-controlled, crossover study                 | 6                                  | Apixaban (10 mg twice daily for 3.5 d)    | 25, 37.5 IU/kg      | • PCC dose-dependently reversed the effects of edoxaban<br>• 50 IU/kg PCC completely reversed extended bleeding duration and ETP<br>• 50 IU/kg PCC partially reversed PT prolongation                                                                                                           |
| Zahir <i>et al.</i> , 2015, <i>Circulation</i> <sup>57</sup>          | Phase I double-blind, randomized, placebo-controlled, two-way crossover study | 110                                | Edoxaban (60 mg)                          | 10, 25, 50 IU/kg    | • PCC dose-dependently reversed the effects of edoxaban<br>• 50 IU/kg PCC completely reversed extended bleeding duration and ETP<br>• 50 IU/kg PCC partially reversed PT prolongation                                                                                                           |
| Barco <i>et al.</i> , 2016, <i>Br J Haematol</i> <sup>63</sup>        | Randomized, double-blind, crossover, placebo-controlled study                 | 6                                  | Rivaroxaban (15 mg twice daily for 2.5 d) | 25, 37.5 IU/kg      | • 25 and 37.5 IU/kg PCC restored PT prolongation<br>• 37.5 IU/kg of PCC led to partial restoration of ETP but 25 IU/kg did not                                                                                                                                                                  |
| Nagalla <i>et al.</i> , 2016, <i>Clin Transl Sci</i> <sup>49</sup>    | Phase I randomized, assessor-blinded, two-period crossover study              | 12                                 | Apixaban (5 mg twice daily for 2.5 d)     | 25 IU/kg            | • PCC increased peak thrombin generation<br>• PCC partially reversed ETP<br>• PCC shortened PT<br>• PCC restored ETP                                                                                                                                                                            |
| Song <i>et al.</i> , 2017, <i>J Thromb Haemost</i> <sup>50</sup>      | Open-label, randomized, placebo-controlled, three-period crossover study      | 15                                 | Apixaban (10 mg twice daily for 3 d)      | 50 IU/kg            | • PCC increased TGA peak height but had little effect on TGA lag time or time to peak<br>• PCC reversed prolonged PT<br>• PCC did not reverse prolonged aPTT<br>• PCC partially reversed PT prolongation<br>• PCC completely restored ETP<br>• PCC had no effect on bleeding duration or volume |
| Levy <i>et al.</i> , 2018, <i>J Thromb Haemost</i> <sup>51</sup>      | Randomized, double-blind, parallel-group study of four-factor PCC vs TXA      | 147 (four-factor-PCC=48)           | Rivaroxaban (20 mg twice daily for 3 d)   | 50 IU/kg            | • PCC had no effect on bleeding duration or volume                                                                                                                                                                                                                                              |

3F, three-factor; 4F, four-factor; aPTT, activated partial thromboplastin time; AUC, area under the curve; CFT, clot formation time; CT, clotting time; ETP, endogenous thrombin potential; PCC, prothrombin complex concentrate; PT, prothrombin time; TGA, thrombin generation assay; TXA, tranexamic acid.

Four-factor PCCs contain a higher content of factor VII than three-factor PCCs, and evidence suggests that four-factor PCCs are a better option for reversing anticoagulation therapies. In a study in healthy volunteers taking rivaroxaban, four-factor PCC reduced mean prothrombin time within 30 min by 2.5 to 3.5 s, *versus* 0.6 to 1.0 s with three-factor PCC.<sup>33</sup>

Based on the available data, PCCs are recommended by international guidelines and used clinically in patients with major or life-threatening bleeding receiving DOAC therapy.<sup>14,16,52</sup> However, it was not known whether reversal in animal models, healthy subjects, and *ex vivo* studies accurately reflects reversal in bleeding patients on DOAC therapy. Therefore, the “An observational multicenter cohort study on efficacy and safety of Unactivated Prothrombin complex concentrate for reversal of oral, direct factor Xa inhibitors Rivaroxaban, Apixaban or edoxaban in Treatment of major bleeding Events” (hereafter referred to as UPRATE) study was initiated to systematically investigate the effectiveness of four-factor PCC to overcome severe bleeding in patients receiving rivaroxaban or apixaban.

### Studies with PCC in Patients with Severe Bleeding

A number of cohort studies with PCC for management of activated factor X inhibitor–related bleeds have been published. In addition, there are registries of DOAC-related bleeds, including different aspects and where some patients were reported to receive PCC. An overview of these studies is provided in table 3.<sup>53–61</sup> Published data from the Dresden Registry on patients with DOACs only included 6 cases with PCC for major bleeding.<sup>6</sup> A prospective cohort from the Stroke Acute Management with Urgent Risk-factor Assessment and Improvement—Non-Valvular Atrial Fibrillation (SAMURAI-NVAF) study included 10 cases, but only 9 of those had been on an activated factor X inhibitor.<sup>62</sup> These and other case series with fewer than 10 cases have not been included in the overview. The assessment of effectiveness was done with different methods, with the two UPRATE studies being the only ones that provided assessment according to the International Society on Thrombosis and Haemostasis recommendation.<sup>63</sup> Overall, the effect was considered poor in 6 to 35%. The duration of follow-up varied from “length of stay in hospital” to 180 days, and the thromboembolism event rate was 0 to 8%, whenever specified (crude pooled ratio, 10 of 254 = 4%). Similarly, for mortality, the crude pooled ratio was 56 of 274 = 20%. The two UPRATE studies, which were prospective cohorts with similar design and outcome assessment, will hereafter be described in more detail.

### UPRATE Study

The UPRATE study included two cohorts, one in Sweden<sup>55</sup> and one in Canada.<sup>56</sup> PCC was administered according to hospital recommendations (Sweden, 1,500 IU for patients weighing less than 65 kg and 2,000 IU for those weighing

65 kg or more; Canada, 2,000 IU for all patients), with the intention of giving approximately 25 IU/kg. Patients could be treated with any approved four-factor PCC (Sweden: Ocplex; Canada: Octaplex [Octapharma, Switzerland] or Sweden: Confidex; Canada: Beriplex [CSL Behring, USA]). There were differences in data collection between the two cohorts, with respect to time of arrival in hospital, hemoglobin levels after treatment, and follow-up on progression of hematoma volume. Treatment effectiveness was assessed as “effective” or “ineffective,” in accordance with the International Society on Thrombosis and Haemostasis recommendation.<sup>63</sup> (In Canada, this was a *post hoc* analysis; effectiveness was initially classified as “good,” “moderate,” or “poor,” according to the Assessment Guide by Sarode *et al.*<sup>64</sup>).

Eighty-four patients were recruited for the Swedish UPRATE cohort, and 66 were recruited for the Canadian cohort (table 4).<sup>55,56</sup> Patient age was similar in the two countries (Sweden, median 75 yr; Canada, mean 77 yr) but, in Sweden *versus* Canada, the percentage of males was lower (57% *versus* 67%) and the median body weight was lower (75 kg *versus* 81 kg). Rivaroxaban was used by more than half of patients in both studies (Sweden, 54%; Canada, 56%). The most common type of hemorrhage necessitating anticoagulation reversal was intracranial bleeding (Sweden, 70% of patients; Canada, 55%), while gastrointestinal bleeding had occurred in 16% of the Swedish patients and 24% of the Canadian patients (table 5).<sup>55,56</sup> Tranexamic acid was added more frequently in Sweden than in Canada (67% *versus* 26% of patients).

Four-factor PCC therapy was found to be “effective” in similar percentages of patients in the two cohorts: 69% in Sweden and 68% in Canada (table 6).<sup>55,56</sup> The percentages of patients receiving additional erythrocyte transfusions were 24% in Sweden and 20% in Canada. Across the two cohorts, there were eight thromboembolic events (5%) within 30 days after PCC administration. No deaths were considered directly related to treatment with PCC; one death (in a patient who had an ischemic stroke 5 days after PCC administration) was assessed as possibly related to treatment with PCC (table 3).<sup>55,56</sup> Overall, the results from the UPRATE study support the use of four-factor-PCCs for treating severe DOAC-associated bleeding, but they should be interpreted with caution due to the absence of a control group.

### Andexanet Alfa, a Novel Antidote to the Anticoagulation Effects of FXA Inhibitors (ANNEXA)-4 Study

The phase III study with andexanet alfa included 352 patients with major bleeding.<sup>27</sup> Patients had to be within an 18-h window from the last dose of the factor Xa inhibitor and for evaluation of effectiveness, the baseline anti-factor Xa activity had to be at least 75 ng/ml. Thus, 249 patients were evaluable for effectiveness, and 171 (69%) were evaluated as excellent, 33 (13%) as good, and 45 (18%) as poor/

**Table 3.** Overview of Studies with PCC for Management of Major Factor Xa Inhibitor–related Bleeding\*

| First Author, Yr, Ref          | Design                              | Cases Treated, No. | Xa inhibitor, No.     | Bleeds Included                                                                               | Follow-up, d            | Effectiveness Assessment                                                              | Thromboembolic Events, No. (%) | Deaths, No. (%)       |
|--------------------------------|-------------------------------------|--------------------|-----------------------|-----------------------------------------------------------------------------------------------|-------------------------|---------------------------------------------------------------------------------------|--------------------------------|-----------------------|
| Grandhi, 2015 <sup>54</sup>    | Retrospective                       | 18                 | riva (16), apix (2)   | ICH                                                                                           | 90                      | Effective 94%, not effective 6%                                                       | 1 (6)                          | 6 (33)                |
| Albaladejo, 2017 <sup>53</sup> | Prospective DOAC registry           | 148                | riva (129), apix (19) | Mainly ICH for PCC                                                                            | 30                      | Totally 44%, partially 27%, not at all 19%                                            | Not specified for PCC          | Not specified for PCC |
| Majeed, 2017 <sup>55</sup>     | Prospective cohort                  | 84                 | riva (45), apix (39)  | International Society on Thrombosis and Haemostasis major bleeds <sup>23</sup>                | 30                      | International Society on Thrombosis and Haemostasis-effective† 69%, not effective 31% | 2 (2)                          | 27 (32)               |
| Schulman, 2018 <sup>56</sup>   | Prospective cohort                  | 66                 | riva (37), apix (29)  | International Society on Thrombosis and Haemostasis major bleeds <sup>23</sup>                | 30                      | International Society on Thrombosis and Haemostasis-effective† 68%, not effective 32% | 5 (8)                          | 9 (14)                |
| Germer, 2018 <sup>57</sup>     | Retrospective of ICH on DOAC, N=146 | 94                 | riva (81), apix (13)  | ICH                                                                                           | 90                      | Effective 65%, not effective 35%                                                      | Not provided                   | Not specified for PCC |
| Testa, 2018 <sup>59</sup>      | Subset of prospective registry      | 20                 | riva (15), apix (20)  | ICH (90%) and GI bleed (10%)                                                                  | 180                     | Not specified for PCC                                                                 | Not specified for PCC          | 4 (20)                |
| Tellor, 2018 <sup>58</sup>     | Retrospective                       | 29                 | riva (18), apix (11)  | 90% had International Society on Thrombosis and Haemostasis major bleed <sup>23</sup> ; 6 ICH | Variable                | Not done                                                                              | 1 (3)                          | 6 (21)                |
| Harrison, 2018 <sup>60</sup>   | Subset of prospective registry      | 14                 | Not specified         | ICH                                                                                           | Length of hospital stay | Hematoma expansion 7%                                                                 | 0                              | 2 (14)                |
| Tao, 2018 <sup>61</sup>        | Retrospective                       | 43                 | riva (49), apix (51)  | ICH (37%), GI bleed (40%)                                                                     | 14                      | Active bleeding despite PCC 7%                                                        | 1 (2)                          | In hospital 2 (5)     |

\*Only studies with at least 10 cases treated with PCC have been included. †Effectiveness assessment performed according to the ISTH recommendation.<sup>62</sup>

apix, Apixaban; DOAC, direct oral anticoagulant; GI, gastrointestinal; ICH, intracranial hemorrhage; ISTH, International Society on Thrombosis and Haemostasis; PCC, prothrombin complex concentrate; Ref, reference; riva, rivaroxaban.



**Table 4.** Baseline Characteristics in the Two UPRATE Cohorts<sup>55,56</sup> and in ANNEXA-4<sup>27</sup>

| Characteristic*                            | Sweden           | Canada           | ANNEXA-4      |
|--------------------------------------------|------------------|------------------|---------------|
| N                                          | 84               | 66               | 352           |
| Age, yr                                    | 75.0 ± 10.9      | 76.9 ± 10.4      | 77.4 ± 10.8   |
| Male sex, No. (%)                          | 48 (57)          | 42 (67)          | 187 (53)      |
| Weight, kg, median (IQR)                   | 75 (66–80)       | 81 (68–90)       | Not available |
| Creatinine clearance, ml/min, median (IQR) | 69.9 (49.6–93.0) | 65.3 (51.8–87.2) |               |
| < 30 ml/min, No. (%)                       | 3 (4)            | 4 (6)            | 33 (9)        |
| 30 to < 60 ml/min, No. (%)                 | 27 (32)          | 18 (27)          | 137 (39)      |
| Indication for anticoagulation, No. (%)    |                  |                  |               |
| Atrial fibrillation                        | 63 (75)          | 54 (82)          | 280 (80)      |
| Venous thromboembolism                     | 18 (21)          | 8 (13)           | 61 (17)       |
| Both indications                           | 3 (4)            | 2 (3)            | Not available |
| Anticoagulant treatment                    |                  |                  |               |
| Patients on rivaroxaban, No. (%)           | 45 (57)          | 37 (56)          | 128 (36)      |
| Daily dose, mg                             | 19.6 ± 2.3       | 18.6 ± 3.4       | 19.3 ± 4.3    |
| Patients on apixaban, No. (%)              | 39               | 29 (44)          | 194 (55)      |
| Daily dose, mg                             | 8.8 ± 2.1        | 8.1 ± 2.4        | 7.7 ± 2.7     |
| Concomitant antiplatelet agent, No. (%)*   | 10 (12)          | 11 (17)          | Not available |

Results are provided as mean ± SD unless otherwise stated. \*One patient in each study was on concomitant aspirin plus clopidogrel. IQR, interquartile range.

**Table 5.** Characteristics of Bleeding Events and Treatment With PCC in UPRATE<sup>55,56</sup> and in ANNEXA-4<sup>27</sup>

| Characteristic*                       | Sweden<br>N = 84    | Canada<br>N = 66    | ANNEXA-4<br>N = 352 |
|---------------------------------------|---------------------|---------------------|---------------------|
| Type of bleeding, No. (%)             |                     |                     |                     |
| Intracranial                          | 59 (70)             | 36 (55)             | 227 (64.5)          |
| Intraspinal                           | 0                   | 2 (3)               | NA                  |
| Gastrointestinal                      | 13 (16)             | 16 (24)             | 90 (25.6)           |
| Retroperitoneal                       | 5 (6)               | 3 (5)               | 16 (11)             |
| Intramuscular                         | 3 (4)               | 2 (3)               | NA                  |
| Other                                 | 4 (5)               | 7 (11)              | NA                  |
| Trauma-related bleed, No. (%)         | 26 (31)             | 25 (38)             | 99 (28)             |
| Criteria for major bleeding, No. (%)† |                     |                     | NA                  |
| Critical organ                        | 60 (71)             | 43 (65)             |                     |
| Overt bleed, transfused ≥ 2 U         | 11 (13)             | 12 (18)             |                     |
| Overt bleed, hemoglobin drop ≥ 20 g/l | 17 (20)             | 28 (42)             |                     |
| Time from onset of bleed to PCC, h    | 6 (2–10)            | 8.6 (5–18)          | NA                  |
| Time from last dose DOAC to PCC, h    | 12.5 (9–16)         | 16.9 (11.9–21.2)    | 9.5 to 13.1‡        |
| First dose of PCC, IU                 | 2,000 (1,500–2,000) | 2,000 (2,000–2,000) | Not applicable      |
| First dose of PCC, IU/kg              | 26.7 (21.4–29.9)    | 25.0 (22.2–31.0)    |                     |
| Second dose of PCC, No. (%)           | 3 (4)               | 2 (3)               | Not applicable      |

\*Results are provided as median (interquartile range) unless otherwise stated. †Some patients fulfilled more than one criterion. ‡Mean time from last dose to andexanet alfa for the 4 groups of Xa-inhibitors studied (edoxaban 9.5 h, apixaban 12.1 h, rivaroxaban 12.3 h, enoxaparin 13.1 h).

DOAC, direct oral anticoagulant; PCC, prothrombin complex concentrate; NA, not available.

none. The composite outcome of excellent or good was slightly better for gastrointestinal bleeding (85%) than for intracranial hemorrhage (80%). Thromboembolic complications within 30 days were observed in 10%, and 14% died within that time period. Major strengths of the study are that clinically important anti-Xa activity was demonstrated in all cases adjudicated for effectiveness and the larger number of patients than in the UPRATE studies. There were, however, more exclusion criteria in ANNEXA-4—for example, intracranial hemorrhage with a Glasgow Coma

Scale score of less than 7, hematoma volume of greater than 60 ml, or estimated survival of less than 1 month.

## Benefit–Risk Assessment for the Use of PCC in Anticoagulated Patients

### Risk of Thromboembolic Events

Most interventions in acutely ill patients incur a degree of risk as well as expenditures, and in patients receiving anticoagulants, the essential risks are bleeding and

**Table 6.** Effectiveness Outcomes of DOAC Reversal Management in UPRATE<sup>55,56</sup>

| Outcome*                                                     | Sweden<br>(n = 84) | Canada<br>(n = 66) |
|--------------------------------------------------------------|--------------------|--------------------|
| Effectiveness according to ISTH recommendation <sup>63</sup> |                    |                    |
| Effective                                                    | 58 (69)            | 45 (68)            |
| Ineffective                                                  | 26 (31)            | 21 (32)            |
| Hemostatic effectiveness rating†                             |                    |                    |
| Good                                                         | 46 (55)            | 43 (65)            |
| Moderate                                                     | 13 (15)            | 13 (20)            |
| Poor/None                                                    | 25 (30)            | 10 (15)            |
| Transfusions after PCC, patients                             |                    |                    |
| Red cells (1–14 units)                                       | 18 (21)            | 16 (24)            |
| Platelets (1–3 apheresis or pooled units)                    | 10 (12)            | 8 (12)             |
| Fresh frozen plasma (1–11 units)                             | 8 (10)             | 4 (6)              |
| Recombinant factor VIIa                                      | 1 (1)              | 0                  |
| Length of hospital stay, days, median (IQR)                  | 7 (3–15)           | 16 (6–30)          |
| Length of stay in ICU, days, median (IQR)                    | 0.5 (0–2)          | 0 (0–6)            |

\*Results are No. (%) unless otherwise stated. †Evaluated using an Assessment Guide<sup>64</sup> in the Swedish study by two steering committee members and in the Canadian study by the treating physician.

DOAC, direct oral anticoagulant; ICU, intensive care unit; IQR, interquartile range; ISTH, International Society on Thrombosis and Haemostasis; PCC, prothrombin complex concentrate.

thromboembolism. In patients with nonvalvular atrial fibrillation, clots in the left atrial appendage were seen in 10% of patients, and twofold to fourfold that proportion were seen in patients who suffered a recent thromboembolic event.<sup>65</sup> The risk of finding these thrombi in the appendage varies from 5 to 17% as inversely correlated to the left atrial appendage flow velocity, and as seen on transesophageal echocardiography.<sup>66</sup> In patients with venous thrombosis, recurrence is prevalent, especially during the first 3 months, before it is resolved or becomes reorganized to a fibrotic scar. Thus, in patients only treated for 6 weeks, the 3-month recurrence rate is 7%,<sup>67</sup> and in patients with venous thromboembolism and cancer, the 3-month recurrence rate while on warfarin is 15%.<sup>68</sup>

When anticoagulant therapy is automatically held after a major bleeding event, the underlying thrombotic risk is exposed. The bleeding event may require surgical intervention and bed rest for at least a few days with ensuing risk of VTE. Furthermore, bleeding initiates hemostatic responses, including stress hormone-induced release of factor VIII and von Willebrand factor from the endothelium and elevated fibrinogen levels.<sup>69</sup> Platelets are also released in premature forms from bone marrow and in mature form from the spleen and lungs.<sup>70</sup> In addition, hemodilution by infusion of crystalloids attenuates procoagulant factors, as well as natural anticoagulants such as antithrombin, resulting in prolonged half-life of activated factor X and thrombin.<sup>70</sup> This can lead to disseminated intravascular coagulation,<sup>70</sup> whereby small clots form in the bloodstream.

To place the risk of thromboembolic events with PCC in context, a meta-analysis found that thromboembolic events

occurred in 4.2% of patients who had warfarin reversed with PCC *versus* 4.8% in patients treated with fresh frozen plasma.<sup>71</sup> Fresh frozen plasma has not been considered a thrombogenic substance. In eight uncontrolled studies using PCC for activated factor X inhibitor–associated major bleeds, the crude pooled incidence of thromboembolic events was 5%.<sup>72</sup> It therefore seems likely that an intrinsic thromboembolic event rate of 4 to 5% in these specific patients has to be accepted when oral anticoagulants are reversed for major bleeding. This risk has been reported as 10% for andexanet alfa.<sup>27</sup>

## Evaluation of Available Evidence

The benefit of PCC for management of activated factor X inhibitor–associated bleeds has been explored in animal models and healthy human volunteers, as discussed earlier in the PCC in the Reversal of Activated Factor X Inhibitors section. However, the ultimate evidence for hemostatic efficacy comes from studies in the target population—patients with major bleeding. Fully conclusive data must come from randomized controlled trials, which have not been performed so far, neither with PCC for reversal of activated factor X inhibitors, nor with the specific antidotes against any of the DOACs. When the effectiveness of reversal is evaluated in uncontrolled studies, several possible scenarios can occur. First, the efficacy of the DOAC reversal agent could be adjudicated as poor because this is truly the case or because the case was not informative. For example, this could occur with a large intracranial hemorrhage where the patient is already moribund due to brain herniation, or in active spurting gastric bleeding (rated 1A or 1B according to the Forrest classification<sup>73</sup>), when reversal of the anticoagulant should not be expected to have effect. Second, the efficacy could be adjudicated as good/excellent because there was no further increase in hematoma volume or drop in hemoglobin levels; however, without serial measurements before reversal, it is not known if bleeding had already stopped by the time the reversal agent was provided. It would obviously be unethical to delay reversal in patients with acute intracranial hemorrhage to obtain serial brain scans or in patients with hemodynamically unstable gastrointestinal bleeding to obtain serial hemoglobin levels. Third, the effectiveness of reversal could be rated as good/excellent because the bleeding stopped but concomitant procedures were performed (external ventricular drain, endoscopic cauterization, therapeutic embolization). These cases should be classified as nonevaluable unless it can be shown that the bleeding stopped or decreased significantly before the procedure. Fourth, the efficacy is rated as good/excellent and it was indeed observed by the treating physician that an overt bleeding ceased with PCC. Cases of this last kind have been described, but it would be difficult to perform a study solely on patients with overt and observable major bleeding.

Comparison of the effectiveness of DOAC reversal agents between different studies and therapies is problematic due to variations in the inclusion and exclusion

criteria, as well as in the definition of effectiveness. The criteria for effectiveness recommended by the International Society on Thrombosis and Haemostasis was used in the two UPRATE cohorts, which showed remarkably similar results (PCC was rated as 68% and 69% “effective”), despite independent assessments.<sup>55,56</sup> Another way to address the question of effectiveness is to understand the mechanism of action. Specific antidotes neutralize (idarucizumab) or compete with (andexanet alfa) the anticoagulant effect of the thrombin or activated factor X inhibitor, which can be directly appreciated as a reduction or normalization of anti-Xa levels. Conversely, PCC has a more general prohemostatic effect with elevation of the vitamin K–dependent factor levels, which compensate for the impaired activation of the prothrombinase complex. Furthermore, some PCCs contain clinically significant concentrations of the anticoagulants protein C and protein S,<sup>31</sup> which may contribute to maintaining hemostatic equilibrium under bleeding conditions and thereby reduce the risk of thrombotic events.

Taken together, there is reason to believe that the use of 25 IU/kg PCC for management of activated factor X inhibitor–associated bleeding has a positive effect without significantly increasing the risk of thromboembolic events. To understand how PCC performs in comparison with a specific antidote, the effectiveness of PCC in the Canadian UPRATE cohort and the effectiveness of andexanet alfa in the interim report from ANNEXA-4<sup>26</sup> were compared in a *post hoc* analysis.<sup>56</sup> The assessment rules from the ANNEXA-4 study for intracranial hemorrhage were applied to a similar subset from UPRATE, and were based on change in hematoma volume and/or thickness. After treatment with andexanet alfa or PCC, the outcome was classified as excellent or good in a similar percentage of patients (80% and 76% of patients, respectively). In the full report on andexanet alfa, 171 patients with intracranial hemorrhage were evaluable for efficacy, and the excellent/good classification remained at 80%.<sup>27</sup>

## Restarting Anticoagulant Therapy

Irrespective of the strategy used for management of bleeding, it is important to restart prophylaxis against VTE as early as possible. Mechanical prophylaxis can be provided while the patient is still bleeding except in case of lower limb injuries. Pharmacologic prophylaxis can be started 2 to 4 days after an intracranial hemorrhage.<sup>74</sup> Pharmacologic stroke prophylaxis for patients with atrial fibrillation unfortunately requires a longer interval due to the higher dose. For patients with additional risk factors for recurrent intracranial or other life-threatening bleeds, one should consider left atrial appendage closure.<sup>75</sup>

## Economic Considerations for the Use of PCC versus Andexanet Alfa

Finally, economic considerations influencing the use of anticoagulation reversal agents should be taken into

account. For the dose of PCC used in most participants of the UPRATE study (2,000 IU, *i.e.*, 26 IU/kg body weight), the price is €800 (France), US\$2,540 (United States),<sup>76</sup> or approximately Can\$1,500 (Canada). In comparison, initial pricing of andexanet alfa (Andexxa, Portola, USA) is US\$3,300 for a vial of 100 mg.<sup>77</sup> The recommended dose based on the ANNEXA-4 study protocol is a 400-mg bolus, followed by 480 mg as a 2-h infusion (nine vials=\$29,700), but for reversal of rivaroxaban, edoxaban, or enoxaparin within 7 h from last dose or unknown interval, the bolus should be 800 mg, followed by a 960-mg infusion (18 vials=\$59,400).<sup>77</sup> Thus for reversal of activated factor X inhibitors, PCC compares favorably to andexanet alfa, at least in terms of direct costs, as well as demonstrating comparable effectiveness and a low level of thromboembolic complications when used for reversal of activated factor X inhibitors in clinical trials so far. Nevertheless, it should be kept in mind that there were differences between the ANNEXA-4 and the UPRATE studies regarding design, patient characteristics, and effectiveness assessments. Only a head-to-head comparison between andexanet alfa and PCC, as requested by U.S. Food and Drug Administration and now being initiated, can demonstrate whether there are significant differences in effectiveness and safety between the products.

## Areas for Further Research

Results from the UPRATE studies provided estimates of the effectiveness of PCC in activated factor X inhibitor reversal, but further studies are needed to optimize treatment. The selection of PCC dose for DOAC reversal requires finding the optimal balance between effectiveness and thrombotic risk. It cannot be excluded that higher doses of PCC may increase the risk of thromboembolic events. A careful increase of the dose of PCC might improve the effectiveness without increased risk and is worth exploring, preferably in a randomized controlled study with two doses.

Another open question is whether PCC should be given at a fixed dose based on body weight. The fixed dose is easy to remember and was used in the Canadian UPRATE cohort with almost identical effectiveness results as in the Swedish cohort, which used a quasi-weight-based regimen (1,500 or 2,000 IU for body weight less than or more than 65.0 kg).<sup>55</sup> However, it should be noted that as patient body mass increases, plasma volume gets larger. Whereas the area under the curve for oral activated factor X inhibitors is minimally influenced by body mass, a larger dose of PCC would be required to achieve the same plasma level as in patients with a lower body mass. Thus, a weight-based regimen for PCC would be more in accordance with the pharmacokinetic data.<sup>78–80</sup>

Outcomes for bleeding patients might be improved further by use of adjunctive therapies. Use of tranexamic acid for patients with mucosal bleeding, although contraindicated for urinary tract bleeding, and desmopressin



or platelet transfusion in case of concomitant antiplatelet therapy, should be explored. This could initially be done by hypothesis-generating subgroup analyses of previous studies.

Finally, the management of nonbleeding patients on activated factor X inhibitors before emergency surgery is of particular interest. If it can be shown that PCC provides normal or almost normal hemostasis during surgery for patients with a clinically important plasma level of anti-Xa, we would obtain crucial evidence for effectiveness. The assessment of effectiveness should include the evaluation by the surgeon, blood loss volume, and postoperative complications.

Future studies of PCC and of DOAC reversal agents must include instructions regarding aggressive thromboprophylaxis. The effectiveness of these agents should be assessed according to the recommendation by International Society on Thrombosis and Haemostasis, with or without other assessment rules, to facilitate comparisons between studies.

## Conclusions

Current data including recent results from the UPRATE study support the use of PCC for the reversal of activated factor X inhibitors in bleeding patients and suggest that PCC could become a useful and relatively affordable option for management of DOAC-associated bleeding. Further studies are needed to investigate the optimal dosing of PCC to maintain the balance between procoagulant effectiveness and low thrombotic risk.

## Acknowledgments

Editorial assistance was provided by Portland Medical Communications Ltd. (Manchester, United Kingdom), funded by Octapharma (Lachen, Switzerland).

## Research Support

Support was provided from institutional and/or departmental sources. Editorial assistance, consisting of suggestion of a preliminary outline, review for clarifications, and some assistance with the bibliography, was provided by Portland Medical Communications (Manchester, United Kingdom), funded by Octapharma (Lachen, Switzerland).

## Competing Interests

Dr. Grottke has received research funding from Bayer Healthcare (Leverkusen, Germany), Biotest (Dreieich, Germany), Boehringer Ingelheim (Ingelheim am Rhein, Germany), CSL Behring (King of Prussia, Pennsylvania), Novo Nordisk (Bagsvaerd, Denmark), Nycomed (Zürich, Switzerland), Portola (San Francisco, California), and Octapharma (Lachen, Switzerland). He has also received honoraria for lectures and consultancy support from Bayer Healthcare, Boehringer Ingelheim, CSL Behring, Octapharma, Pfizer (New York, New York), Portola,

Sanofi (Paris, France), and Shire (Lexington, Massachusetts). Dr. Schulman has received funding from Boehringer Ingelheim, Baxter (Deerfield, Illinois), and Octapharma and honoraria from Boehringer Ingelheim, Alnylam (Cambridge, Massachusetts), Bayer, Daiichi Sankyo (Basking Ridge, New Jersey), and Sanofi (North York, Ontario, Canada).

## Correspondence

Address correspondence to Dr. Schulman: Thrombosis Service, HHS-General Hospital, 237 Barton Street East, Hamilton, Ontario, L8L 2X2, Canada. schulms@mcmaster.ca. Information on purchasing reprints may be found at [www.anesthesiology.org](http://www.anesthesiology.org) or on the masthead page at the beginning of this issue. ANESTHESIOLOGY's articles are made freely accessible to all readers, for personal use only, 6 months from the cover date of the issue.

## References

1. Kuruvilla M, Gurk-Turner C: A review of warfarin dosing and monitoring. *Proc (Bayl Univ Med Cent)* 2001; 14:305–6
2. Mekaj YH, Mekaj AY, Duci SB, Miftari EI: New oral anticoagulants: their advantages and disadvantages compared with vitamin K antagonists in the prevention and treatment of patients with thromboembolic events. *Ther Clin Risk Manag* 2015; 11:967–77
3. Vranckx P, Valgimigli M, Heidbuchel H: The significance of drug-drug and drug-food interactions of oral anticoagulation. *Arrhythm Electrophysiol Rev* 2018; 7:55–61
4. Ruff CT, Giugliano RP, Braunwald E, Hoffman EB, Deenadayalu N, Ezekowitz MD, Camm AJ, Weitz JI, Lewis BS, Parkhomenko A, Yamashita T, Antman EM: Comparison of the efficacy and safety of new oral anticoagulants with warfarin in patients with atrial fibrillation: A meta-analysis of randomised trials. *Lancet* 2014; 383:955–62
5. Coleman CI, Turpie AGG, Bunz TJ, Eriksson D, Sood NA, Baker WL: Effectiveness and safety of rivaroxaban vs. warfarin in non-valvular atrial fibrillation patients with a non-sex-related CHA2DS2-VASc score of 1. *Eur Heart J Cardiovasc Pharmacother* 2019; 5:64–9
6. Beyer-Westendorf J, Förster K, Pannach S, Ebertz F, Gelbricht V, Thieme C, Michalski F, Köhler C, Werth S, Sahin K, Tittl L, Hänsel U, Weiss N: Rates, management, and outcome of rivaroxaban bleeding in daily care: Results from the Dresden NOAC registry. *Blood* 2014; 124:955–62
7. Li X, Keshishian A, Hamilton M, Horblyuk R, Gupta K, Luo X, Mardekian J, Friend K, Nadkarni A, Pan X, Lip GYH, Deitelzweig S: Apixaban 5 and 2.5 mg twice-daily *versus* warfarin for stroke prevention in nonvalvular atrial fibrillation patients: Comparative effectiveness

- and safety evaluated using a propensity-score-matched approach. *PLoS One* 2018; 13:e0191722
8. Wolfe Z, Khan SU, Nasir F, Raghu Subramanian C, Lash B: A systematic review and Bayesian network meta-analysis of risk of intracranial hemorrhage with direct oral anticoagulants. *J Thromb Haemost* 2018; 16:1296–306
  9. Miller CS, Dorreen A, Martel M, Huynh T, Barkun AN: Risk of gastrointestinal bleeding in patients taking non-vitamin K antagonist oral anticoagulants: A systematic review and meta-analysis. *Clin Gastroenterol Hepatol* 2017; 15:1674–1683.e3
  10. Hylek EM, Held C, Alexander JH, Lopes RD, De Caterina R, Wojdyla DM, Huber K, Jansky P, Steg PG, Hanna M, Thomas L, Wallentin L, Granger CB: Major bleeding in patients with atrial fibrillation receiving apixaban or warfarin: The ARISTOTLE Trial (Apixaban for Reduction in Stroke and Other Thromboembolic Events in Atrial Fibrillation): Predictors, characteristics, and clinical outcomes. *J Am Coll Cardiol* 2014; 63:2141–7
  11. Piccini JP, Garg J, Patel MR, Lokhnygina Y, Goodman SG, Becker RC, Berkowitz SD, Breithardt G, Hacke W, Halperin JL, Hankey GJ, Nessel CC, Mahaffey KW, Singer DE, Califf RM, Fox KA; ROCKET AF Investigators: Management of major bleeding events in patients treated with rivaroxaban vs. warfarin: results from the ROCKET AF trial. *Eur Heart J* 2014; 35:1873–80
  12. Frontera JA, Lewin JJ 3rd, Rabinstein AA, Aisiku IP, Alexandrov AW, Cook AM, del Zoppo GJ, Kumar MA, Peerschke EI, Stiefel MF, Teitelbaum JS, Wartenberg KE, Zerfoss CL: Guideline for reversal of antithrombotics in intracranial hemorrhage: A statement for healthcare professionals from the Neurocritical Care Society and Society of Critical Care Medicine. *Neurocrit Care* 2016; 24:6–46
  13. Tran HA, Chunilal SD, Harper PL, Tran H, Wood EM, Gallus AS; Australasian Society of Thrombosis and Haemostasis (ASTH): An update of consensus guidelines for warfarin reversal. *Med J Aust* 2013; 198:198–9
  14. Rossaint R, Bouillon B, Cerny V, Coats TJ, Duranteau J, Fernandez-Mondejar E, Filipescu D, Hunt BJ, Komadina R, Nardi G, Neugebauer EA, Ozier Y, Riddez L, Schultz A, Vincent JL, Spahn DR: The European guideline on management of major bleeding and coagulopathy following trauma: Fourth edition. *Crit Care* 2016; 20:100
  15. Lip GYH, Collet JP, de Caterina R, Fauchier L, Lane DA, Larsen TB, Marin F, Morais J, Narasimhan C, Olshansky B, Pierard L, Potpara T, Sarrafzadegan N, Sliwa K, Varela G, Vilahur G, Weiss T, Boriani G, Rocca B: Antithrombotic therapy in atrial fibrillation associated with valvular heart disease: Executive summary of a joint consensus document from the European Heart Rhythm Association (EHRA) and European Society of Cardiology Working Group on Thrombosis, endorsed by the ESC Working Group on Valvular Heart Disease, Cardiac Arrhythmia Society of Southern Africa (CASSA), Heart Rhythm Society (HRS), Asia Pacific Heart Rhythm Society (APHRS), South African Heart (SA Heart) Association and Sociedad Latinoamericana de Estimulación Cardíaca y Electrofisiología (SOLEACE). *Thromb Haemost* 2017; 117:2215–36
  16. Steffel J, Verhamme P, Potpara TS, Albaladejo P, Antz M, Desteghe L, Haeusler KG, Oldgren J, Reinecke H, Roldan-Schilling V, Rowell N, Sinnaeve P, Collins R, Camm AJ, Heidbüchel H; ESC Scientific Document Group: The 2018 European Heart Rhythm Association Practical Guide on the use of non-vitamin K antagonist oral anticoagulants in patients with atrial fibrillation. *Eur Heart J* 2018; 39:1330–93
  17. Xarelto: 10mg film-coated tablets. Summary of product characteristics, 2018. Available at: <https://www.medicines.org.uk/emc/product/6402/smpc>. Accessed July 25, 2019.
  18. Lixiana: 15mg film-coated tablets. Summary of product characteristics, 2018. Available at: <https://www.medicines.org.uk/emc/product/6907/smpc>. Accessed July 25, 2019.
  19. Eliquis: 5mg film-coated tablets. Summary of product characteristics, 2018. Available at: <https://www.medicines.org.uk/emc/product/2878/smpc>. Accessed July 25, 2019.
  20. Levi M, Eerenberg E, Kamphuisen PW: Bleeding risk and reversal strategies for old and new anticoagulants and antiplatelet agents. *J Thromb Haemost* 2011; 9:1705–12
  21. Lutz J, Jurk K, Schinzel H: Direct oral anticoagulants in patients with chronic kidney disease: patient selection and special considerations. *Int J Nephrol Renovasc Dis* 2017; 10:135–43
  22. Ghadimi K, Levy JH, Welsby IJ: Perioperative management of the bleeding patient. *Br J Anaesth* 2016; 117(suppl 3):iii18–30
  23. Schulman S, Kearon C; Subcommittee on Control of Anticoagulation of the Scientific and Standardization Committee of the International Society on Thrombosis and Haemostasis: Definition of major bleeding in clinical investigations of antihemostatic medicinal products in non-surgical patients. *J Thromb Haemost* 2005; 3:692–4
  24. Pollack CV Jr, Reilly PA, Eikelboom J, Glund S, Verhamme P, Bernstein RA, Dubiel R, Huisman MV, Hylek EM, Kamphuisen PW, Kreuzer J, Levy JH, Sellke FW, Stangier J, Steiner T, Wang B, Kam CW, Weitz JI: Idarucizumab for dabigatran reversal. *N Engl J Med* 2015; 373:511–20
  25. Grottko O, Honickel M, van Ryn J, ten Cate H, Rossaint R, Spronk HM: Idarucizumab, a specific dabigatran reversal agent, reduces blood loss in a porcine

- model of trauma with dabigatran anticoagulation. *J Am Coll Cardiol* 2015; 66:1518–9
26. Connolly SJ, Milling TJ Jr, Eikelboom JW, Gibson CM, Curnutte JT, Gold A, Bronson MD, Lu G, Conley PB, Verhamme P, Schmidt J, Middeldorp S, Cohen AT, Beyer-Westendorf J, Albaladejo P, Lopez-Sendon J, Goodman S, Leeds J, Wiens BL, Siegal DM, Zotova E, Meeks B, Nakamya J, Lim WT, Crowther M; ANNEXA-4 Investigators: Andexanet alfa for acute major bleeding associated with factor Xa inhibitors. *N Engl J Med* 2016; 375:1131–41
  27. Connolly SJ, Crowther M, Eikelboom JW, Gibson CM, Curnutte JT, Lawrence JH, Yue P, Bronson MD, Lu G, Conley PB, Verhamme P, Schmidt J, Middeldorp S, Cohen AT, Beyer-Westendorf J, Albaladejo P, Lopez-Sendon J, Demchuk AM, Pallin DJ, Concha M, Goodman S, Leeds J, Souza S, Siegal DM, Zotova E, Meeks B, Ahmad S, Nakamya J, Milling TJ, Jr.: Full study report of andexanet alfa for bleeding associated with factor Xa inhibitors. *N Engl J Med* 2019; 380:1326–35
  28. Milne RM, Gunn AA, Griffiths JM, Ruckley CX: Postoperative deep venous thrombosis. A comparison of diagnostic techniques. *Lancet* 1971; 2:445–7
  29. Goldstein JN, Refaai MA, Milling TJ Jr, Lewis B, Goldberg-Alberts R, Hug BA, Sarode R: Four-factor prothrombin complex concentrate *versus* plasma for rapid vitamin K antagonist reversal in patients needing urgent surgical or invasive interventions: a phase 3b, open-label, non-inferiority, randomised trial. *Lancet* 2015; 385:2077–87
  30. Suryanarayan D, Schulman S: Potential antidotes for reversal of old and new oral anticoagulants. *Thromb Res* 2014; 133(suppl 2):S158–66
  31. Franchini M, Lippi G: Prothrombin complex concentrates: An update. *Blood Transfus* 2010; 8:149–54
  32. Schulman S, Bijsterveld NR: Anticoagulants and their reversal. *Transfus Med Rev* 2007; 21:37–48
  33. Levi M, Moore KT, Castillejos CF, Kubitz D, Berkowitz SD, Goldhaber SZ, Raghoobar M, Patel MR, Weitz JI, Levy JH: Comparison of three-factor and four-factor prothrombin complex concentrates regarding reversal of the anticoagulant effects of rivaroxaban in healthy volunteers. *J Thromb Haemost* 2014; 12:1428–36
  34. Herzog E, Kasperer F, Krege W, Mueller-Cohrs J, Doerr B, Niebl P, Dickneite G: Four-factor prothrombin complex concentrate reverses apixaban-associated bleeding in a rabbit model of acute hemorrhage. *J Thromb Haemost* 2015; 13:2220–6
  35. Herzog E, Kasperer F, Krege W, Mueller-Cohrs J, Doerr B, Niebl P, Dickneite G: Correlation of coagulation markers and four-factor-PCC-mediated reversal of rivaroxaban in a rabbit model of acute bleeding. *Thromb Res* 2015; 135:554–60
  36. Honickel M, Braunschweig T, van Ryn J, Ten Cate H, Spronk HM, Rossaint R, Grottko O: Prothrombin complex concentrate is effective in treating the anticoagulant effects of dabigatran in a porcine polytrauma model. *ANESTHESIOLOGY* 2015; 123:1350–61
  37. Zahir H, Brown KS, Vandell AG, Desai M, Maa JF, Dishy V, Lomeli B, Feussner A, Feng W, He L, Grosso MA, Lanz HJ, Antman EM: Edoxaban effects on bleeding following punch biopsy and reversal by a 4-factor prothrombin complex concentrate. *Circulation* 2015; 131:82–90
  38. Beriplex: P/N 250 IU. Summary of product characteristics. 2018. Available at: <https://www.medicines.org.uk/emc/product/6354/smpc>. Accessed October 17, 2018.
  39. Octaplex: 500 IU. Summary of product characteristics. 2017. Available at: <https://www.medicines.org.uk/emc/product/6566/smpc>. Accessed October 17, 2018.
  40. Godier A, Miclot A, Le Bonniec B, Durand M, Fischer AM, Emmerich J, Marchand-Leroux C, Lecompte T, Samama CM: Evaluation of prothrombin complex concentrate and recombinant activated factor VII to reverse rivaroxaban in a rabbit model. *ANESTHESIOLOGY* 2012; 116:94–102
  41. Perzborn E, Gruber A, Tinel H, Marzec UM, Buetehorn U, Buchmueller A, Heitmeier S, Laux V: Reversal of rivaroxaban anticoagulation by haemostatic agents in rats and primates. *Thromb Haemost* 2013; 110:162–72
  42. Fukuda T, Honda Y, Kamisato C, Morishima Y, Shibano T: Reversal of anticoagulant effects of edoxaban, an oral, direct factor Xa inhibitor, with haemostatic agents. *Thromb Haemost* 2012; 107:253–9
  43. Dinkelaar J, Molenaar PJ, Ninivaggi M, de Laat B, Brinkman HJ, Leyte A: *In vitro* assessment, using thrombin generation, of the applicability of prothrombin complex concentrate as an antidote for rivaroxaban. *J Thromb Haemost* 2013; 11:1111–8
  44. Perzborn E, Heitmeier S, Laux V, Buchmüller A: Reversal of rivaroxaban-induced anticoagulation with prothrombin complex concentrate, activated prothrombin complex concentrate and recombinant activated factor VII *in vitro*. *Thromb Res* 2014; 133:671–81
  45. Escolar G, Arellano-Rodrigo E, Lopez-Vilchez I, Molina P, Sanchis J, Reverter JC, Carne X, Cid J, Villalta J, Tassies D, Galan AM, Diaz-Ricart M: Reversal of rivaroxaban-induced alterations on hemostasis by different coagulation factor concentrates – *In vitro* studies with steady and circulating human blood. *Circ J* 2015; 79:331–8
  46. Marlu R, Hodaj E, Paris A, Albaladejo P, Cracowski JL, Cracowski JL, Pernod G: Effect of non-specific reversal agents on anticoagulant activity of dabigatran and rivaroxaban: A randomised crossover *ex vivo* study in healthy volunteers. *Thromb Haemost* 2012; 108:217–24
  47. Körber MK, Langer E, Kaufner L, Sander M, Von Heymann C: *In vitro* reversal of supratherapeutic

- rivaroxaban levels with coagulation factor concentrates. *Blood Transfus* 2016; 14:481–6
48. Cheung YW, Barco S, Hutten BA, Meijers JC, Middeldorp S, Coppens M: *In vivo* increase in thrombin generation by four-factor prothrombin complex concentrate in apixaban-treated healthy volunteers. *J Thromb Haemost* 2015; 13:1799–805
  49. Nagalla S, Thomson L, Oppong Y, Bachman B, Chervoneva I, Kraft WK: Reversibility of apixaban anticoagulation with a four-factor prothrombin complex concentrate in healthy volunteers. *Clin Transl Sci* 2016; 9:176–80
  50. Song Y, Wang Z, Perlstein I, Wang J, LaCreta F, Frost RJA, Frost C: Reversal of apixaban anticoagulation by four-factor prothrombin complex concentrates in healthy subjects: A randomized three-period crossover study. *J Thromb Haemost* 2017; 15:2125–37
  51. Levy JH, Moore KT, Neal MD, Schneider D, Marcisin VS, Ariyawansa J, Weitz JI: Rivaroxaban reversal with prothrombin complex concentrate or tranexamic acid in healthy volunteers. *J Thromb Haemost* 2018; 16:54–64
  52. Kozek-Langenecker SA, Afshari A, Albaladejo P, Santullano CA, De Robertis E, Filipescu DC, Fries D, Görlinger K, Haas T, Imberger G, Jacob M, Lancé M, Llau J, Mallett S, Meier J, Rahe-Meyer N, Samama CM, Smith A, Solomon C, Van der Linden P, Wikkelsø AJ, Wouters P, Wyffels P: Management of severe perioperative bleeding: guidelines from the European Society of Anaesthesiology. *Eur J Anaesthesiol* 2013; 30:270–382
  53. Albaladejo P, Samama CM, Sié P, Kauffmann S, Mémier V, Suchon P, Viallon A, David JS, Gruel Y, Bellamy L, de Maistre E, Romegoux P, Thoret S, Pernod G, Bosson JL; GIHP-NACO Study Group: Management of severe bleeding in patients treated with direct oral anticoagulants: An observational registry analysis. *ANESTHESIOLOGY* 2017; 127:111–20
  54. Grandhi R, Newman WC, Zhang X, Harrison G, Moran C, Okonkwo DO, Ducruet AF: Administration of 4-factor prothrombin complex concentrate as an antidote for intracranial bleeding in patients taking direct factor Xa inhibitors. *World Neurosurg* 2015; 84:1956–61
  55. Majeed A, Ågren A, Holmström M, Bruzelius M, Chaireti R, Odeberg J, Hempel EL, Magnusson M, Frisk T, Schulman S: Management of rivaroxaban- or apixaban-associated major bleeding with prothrombin complex concentrates: A cohort study. *Blood* 2017; 130:1706–12
  56. Schulman S, Gross PL, Ritchie B, Nahirniak S, Lin Y, Lieberman L, Carrier M, Crowther MA, Ghosh I, Lazo-Langner A, Zondag M; Study Investigators: Prothrombin complex concentrate for major bleeding on factor Xa inhibitors: A prospective cohort study. *Thromb Haemost* 2018; 118:842–51
  57. Gerner ST, Kuramatsu JB, Sembill JA, Sprügel MI, Endres M, Haeusler KG, Vajkoczy P, Ringleb PA, Purruicker J, Rizos T, Erbguth F, Schellinger PD, Fink GR, Stetefeld H, Schneider H, Neugebauer H, Röther J, Claßen J, Michalski D, Dörfler A, Schwab S, Huttner HB; RETRACE II (German-Wide Multicenter Analysis of Oral Anticoagulation-Associated Intracerebral Hemorrhage II) Investigators: Association of prothrombin complex concentrate administration and hematoma enlargement in non-vitamin K antagonist oral anticoagulant-related intracerebral hemorrhage. *Ann Neurol* 2018; 83:186–96
  58. Tellor KB, Barasch NS, Lee BM: Clinical experience reversing factor Xa inhibitors with four-factor prothrombin complex concentrate in a community hospital. *Blood Transfus* 2018; 16:382–6
  59. Testa S, Ageno W, Antonucci E, Morandini R, Beyer-Westendorf J, Paciaroni M, Righini M, Sivera P, Verhamme P, Pengo V, Poli D, Palareti G: Management of major bleeding and outcomes in patients treated with direct oral anticoagulants: Results from the START-Event registry. *Intern Emerg Med* 2018; 13:1051–8
  60. Harrison SK, Garrett JS, Kohman KN, Kline JA: Comparison of outcomes in patients with intracranial hemorrhage on factor Xa inhibitors *versus* vitamin K antagonists treated with 4-factor prothrombin complex concentrate. *Proc (Bayl Univ Med Cent)* 2018; 31:153–6
  61. Tao J, Bukanova EN, Akhtar S: Safety of 4-factor prothrombin complex concentrate (four-factor-PCC) for emergent reversal of factor Xa inhibitors. *J Intensive Care* 2018; 6:34
  62. Yoshimura S, Sato S, Todo K, Okada Y, Furui E, Matsuki T, Yamagami H, Koga M, Takahashi JC, Nagatsuka K, Arihiro S, Toyoda K; Stroke Acute Management with Urgent Risk-factor Assessment and Improvement (SAMURAI) Study Investigators: Prothrombin complex concentrate administration for bleeding associated with non-vitamin K antagonist oral anticoagulants: The SAMURAI-NVAF study. *J Neurol Sci* 2017; 375:150–7
  63. Khorsand N, Majeed A, Sarode R, Beyer-Westendorf J, Schulman S, Meijer K; Subcommittee on Control of Anticoagulation: Assessment of effectiveness of major bleeding management: Proposed definitions for effective hemostasis: Communication from the SSC of the International Society on Thrombosis and Haemostasis. *J Thromb Haemost* 2016; 14:211–4
  64. Sarode R, Milling TJ Jr, Refaai MA, Mangione A, Schneider A, Durn BL, Goldstein JN: Efficacy and safety of a 4-factor prothrombin complex concentrate in patients on vitamin K antagonists presenting



- with major bleeding: A randomized, plasma-controlled, phase IIIb study. *Circulation* 2013; 128:1234–43
65. Hart RG, Halperin JL: Atrial fibrillation and stroke: Concepts and controversies. *Stroke* 2001; 32:803–8
  66. Agmon Y, Khandheria BK, Gentile F, Seward JB: Echocardiographic assessment of the left atrial appendage. *J Am Coll Cardiol* 1999; 34:1867–77
  67. Schulman S, Rhedin AS, Lindmarker P, Carlsson A, Lärfars G, Nicol P, Loogna E, Svensson E, Ljungberg B, Walter H: A comparison of six weeks with six months of oral anticoagulant therapy after a first episode of venous thromboembolism. Duration of Anticoagulation Trial Study Group. *N Engl J Med* 1995; 332:1661–5
  68. Lee AY, Levine MN, Baker RI, Bowden C, Kakkar AK, Prins M, Rickles FR, Julian JA, Haley S, Kovacs MJ, Gent M; Randomized Comparison of Low-Molecular-Weight Heparin *versus* Oral Anticoagulant Therapy for the Prevention of Recurrent Venous Thromboembolism in Patients with Cancer (CLOT) Investigators: Low-molecular-weight heparin *versus* a coumarin for the prevention of recurrent venous thromboembolism in patients with cancer. *N Engl J Med* 2003; 349:146–53
  69. Grant PJ: Hormonal regulation of the acute haemostatic response to stress. *Blood Coagul Fibrinolysis* 1990; 1:299–306
  70. Bolliger D, Görlinger K, Tanaka KA: Pathophysiology and treatment of coagulopathy in massive hemorrhage and hemodilution. *ANESTHESIOLOGY* 2010; 113:1205–19
  71. Chai-Adisaksopha C, Hillis C, Siegal DM, Movilla R, Heddle N, Iorio A, Crowther M: Prothrombin complex concentrates *versus* fresh frozen plasma for warfarin reversal. A systematic review and meta-analysis. *Thromb Haemost* 2016; 116:879–90
  72. Piran S, Khatib R, Schulman S, Majeed A, Holbrook A, Witt DM, Wiercioch W, Schünemann HJ, Nieuwlaar R: Management of direct factor Xa inhibitor-related major bleeding with prothrombin complex concentrate: A meta-analysis. *Blood Adv* 2019; 3:158–67
  73. Forrest JA, Finlayson ND, Shearman DJ: Endoscopy in gastrointestinal bleeding. *Lancet* 1974; 2:394–7
  74. Lansberg MG, O'Donnell MJ, Khatri P, Lang ES, Nguyen-Huynh MN, Schwartz NE, Sonnenberg FA, Schulman S, Vandvik PO, Spencer FA, Alonso-Coello P, Guyatt GH, Akl EA: Antithrombotic and thrombolytic therapy for ischemic stroke: Antithrombotic Therapy and Prevention of Thrombosis, 9th ed: American College of Chest Physicians Evidence-Based Clinical Practice Guidelines. *Chest* 2012; 141: e601S–e636S
  75. Sahay S, Nombela-Franco L, Rodes-Cabau J, Jimenez-Quevedo P, Salinas P, Biagioni C, Nuñez-Gil I, Gonzalo N, de Agustín JA, Del Trigo M, Perez de Isla L, Fernández-Ortiz A, Escaned J, Macaya C: Efficacy and safety of left atrial appendage closure *versus* medical treatment in atrial fibrillation: A network meta-analysis from randomised trials. *Heart* 2017; 103:139–47
  76. Mavor GE, Galloway JM: Iliofemoral venous thrombosis. Pathological considerations and surgical management. *Br J Surg* 1969; 56:45–59
  77. McLachlin J, Richards T, Paterson JC: An evaluation of clinical signs in the diagnosis of venous thrombosis. *Arch Surg* 1962; 85:738–44
  78. Kubitz D, Becka M, Zuehlsdorf M, Mueck W: Body weight has limited influence on the safety, tolerability, pharmacokinetics, or pharmacodynamics of rivaroxaban (BAY 59-7939) in healthy subjects. *J Clin Pharmacol* 2007; 47:218–26
  79. Mueck W, Lensing AW, Agnelli G, Decousus H, Prandoni P, Misselwitz F: Rivaroxaban: Population pharmacokinetic analyses in patients treated for acute deep-vein thrombosis and exposure simulations in patients with atrial fibrillation treated for stroke prevention. *Clin Pharmacokinet* 2011; 50:675–86
  80. Upreti VV, Wang J, Barrett YC, Byon W, Boyd RA, Pursley J, LaCreta FP, Frost CE: Effect of extremes of body weight on the pharmacokinetics, pharmacodynamics, safety and tolerability of apixaban in healthy subjects. *Br J Clin Pharmacol* 2013; 76:908–16
  81. Pradaxa: 110 mg hard capsules. Summary of product characteristics, 2018. Available at: <https://www.medicines.org.uk/emc/product/6229/smpc>. Accessed July 25, 2019.
  82. Eerenberg ES, Kamphuisen PW, Sijpkens MK, Meijers JC, Buller HR, Levi M: Reversal of rivaroxaban and dabigatran by prothrombin complex concentrate: A randomized, placebo-controlled, crossover study in healthy subjects. *Circulation* 2011; 124:1573–9
  83. Barco S, Whitney Cheung Y, Coppens M, Hutten BA, Meijers JC, Middeldorp S: In vivo reversal of the anticoagulant effect of rivaroxaban with four-factor prothrombin complex concentrate. *Br J Haematol* 2016; 172:255–61
